# Supplementary material for: Der p 1-based immunotoxin as potential tool for the treatment of dust mite respiratory allergy
Source: PubMed Central journal article supplement (PMC7378242; doi:10.1038/s41598-020-69166-w), 2020-07-23
Supplement: 41598_2020_69166_MOESM1_ESM.pdf [file 41598_2020_69166_MOESM1_ESM.pdf]

# **Der p 1-based Immunotoxin as Potential Tool for the Treatment of Dust Mite respiratory Allergy**

Lázaro-Gorines, R.

López-Rodríguez, JC.

Benedé, S.

González, M.

Mayorga, C.

Vogel, L.

Martínez-del-Pozo, A.

Lacadena, J.

Villalba, M.

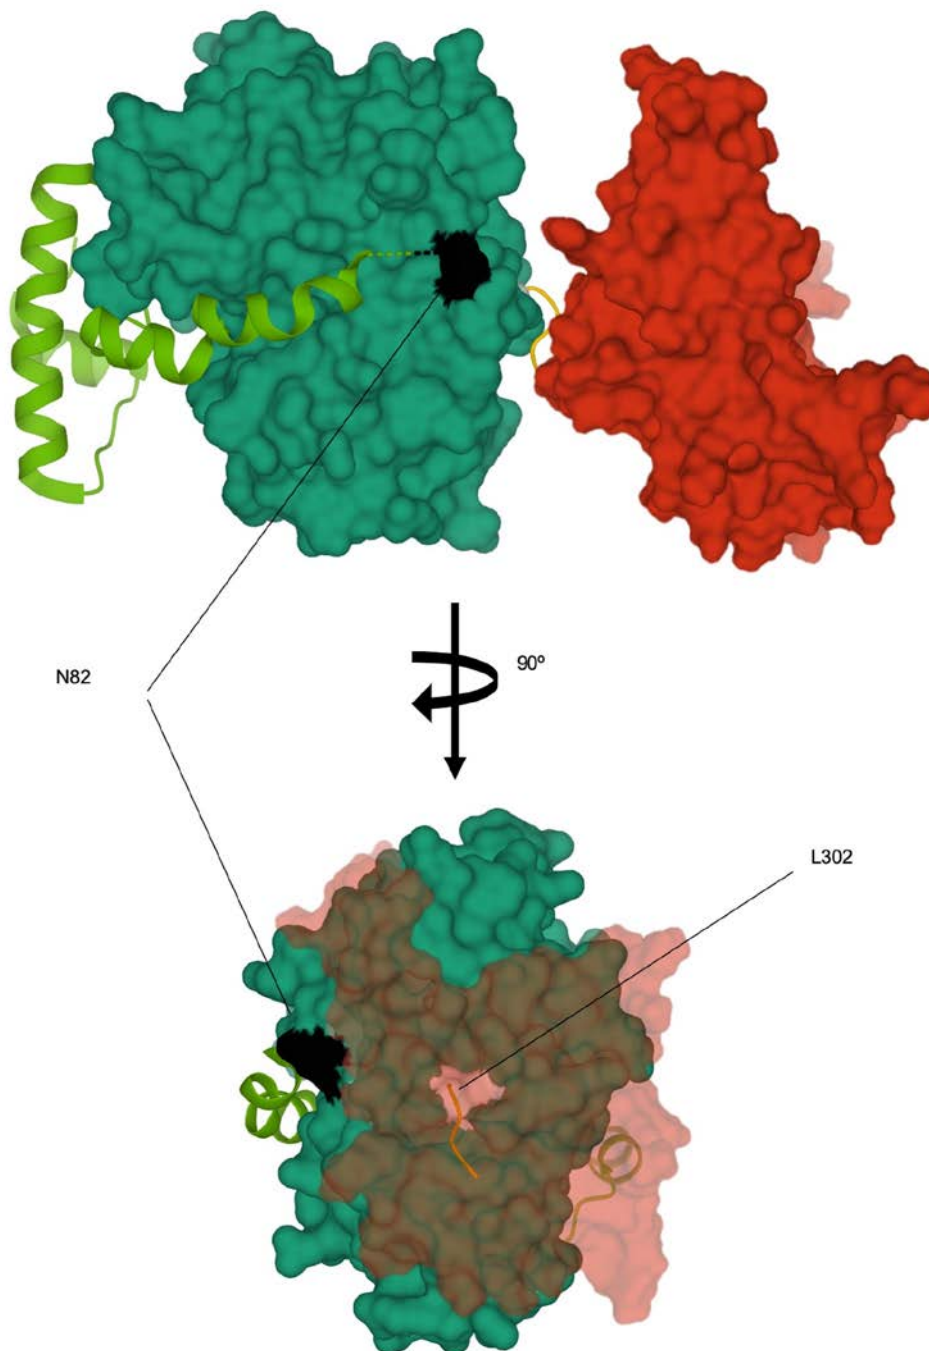

Figure S1

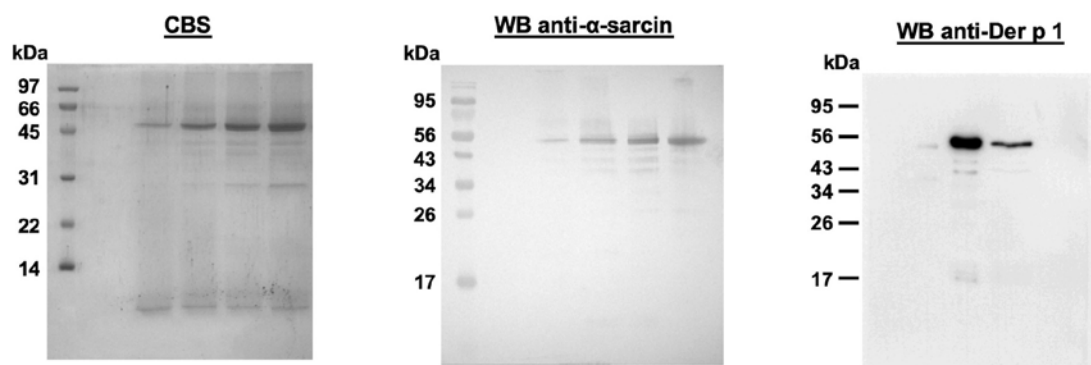

Figure S2

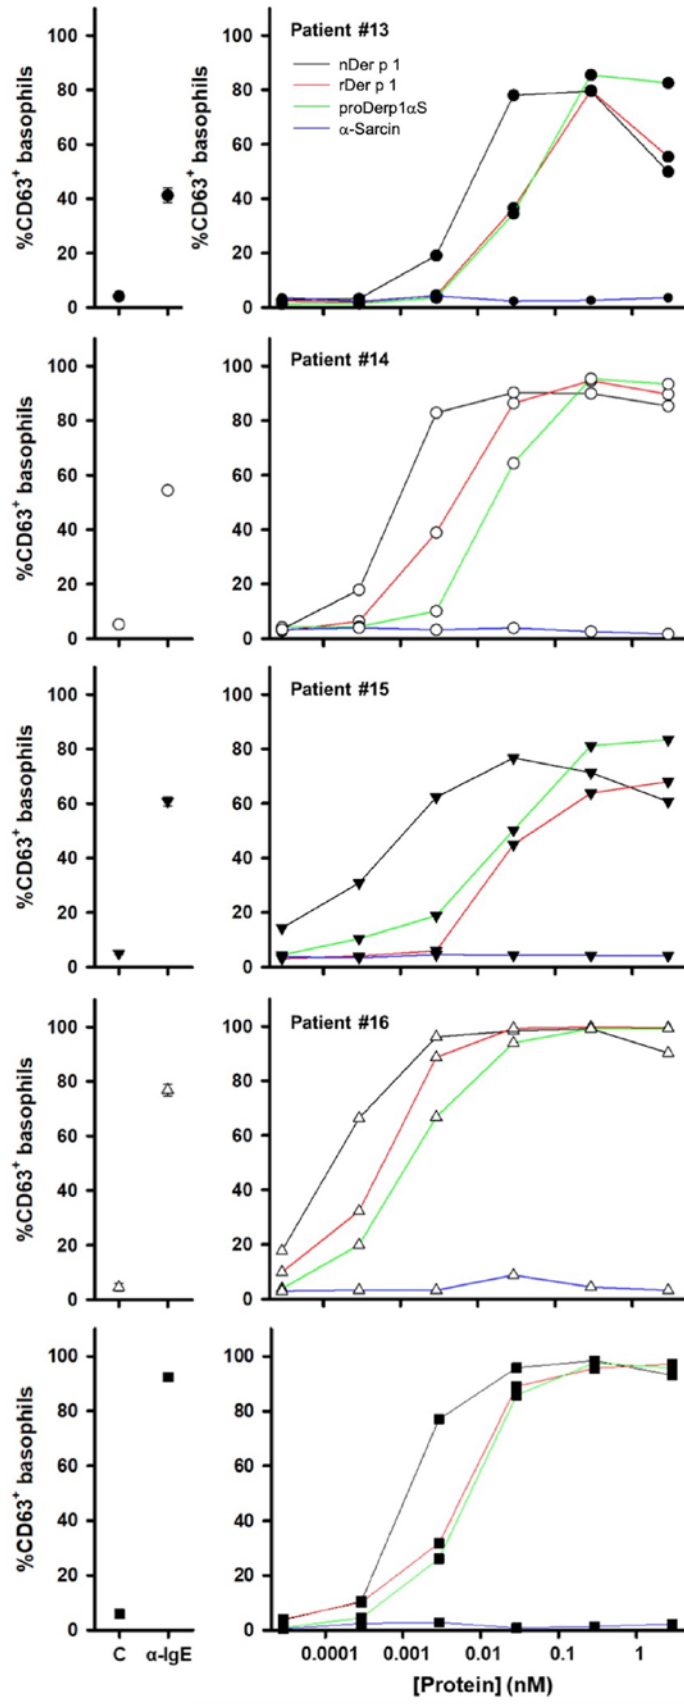

Figure S3

| Serum number | slgE to<br><i>D. pteronyssinus</i><br>(kU/L) |
|--------------|----------------------------------------------|
| 1*           | 57.5                                         |
| 2            | 47.7                                         |
| 3            | 36.2                                         |
| 4            | 76.7                                         |
| 5*           | 100                                          |
| 6*           | 84.3                                         |
| 7            | 51.4                                         |
| 8            | 36.2                                         |
| 9            | 47.4                                         |
| 10           | 100                                          |
| 11           | 100                                          |
| 12*          | 30.3                                         |
| 13*/**       | >100                                         |
| 14**         | >100                                         |
| 15**         | 27.3                                         |
| 16**         | 51,1                                         |
| 17**         | >100                                         |
| C1*          | <0.35                                        |
| C2**         | <0.35                                        |

Table S1

## Supplementary Figure Legends

### **Figure S1. Schematic representation of proDerp1 $\alpha$ S immunotoxin structure.**

Three-dimensional conformational representation of proDerp1 $\alpha$ S construct built in accordance to crystal structures of Der p 1 pro form (PDB code: 1XKG; in turquoise) and  $\alpha$ -sarcin (PDB code: 1DE3; in red). The green ribbon diagram represents Der p 1 N-terminal pro-peptide while the glycine-glycine-arginine linker (GGR) appears in yellow. The structures of mature Der p 1 and  $\alpha$ -sarcin are shown as molecular surface representations. The Der p 1 mature N- and C-terminal residues (N82, in black, and L302, in white) are also indicated.

### **Figure S2. Coomassie blue Staining (CBS) SDS-PAGE and Western Blot analysis of purified proDerp1 $\alpha$ S immunotoxin.**

Full-length gels from Figure 1B are displayed. CBS SDS-PAGE (left) and Western blot analysis using rabbit anti- $\alpha$ -sarcin (middle) or anti-Der p 1 antisera (right). CBS protein molecular weight standards correspond to Bio-Rad Unstained SDS-PAGE low range Standards; while those shown in the blots are prestained Bio-Rad Precision Plus protein molecular weight standards. Images correspond to full-length gels and blots acquired and analysed using the Gel Doc XR Imaging System and Quantity One 1-D analysis software (BioRad) (left/center) or ChemiDoc-It (UVP) and VisionWorks LS (right).

**Figure S3. Individual basophil degranulation profile for each patient.** Basophil activation test dose dependant profiles for nDer p 1, rproDer p 1, proDerp1 $\alpha$ S and  $\alpha$ -sarcin performed with basophils from Der p 1-allergic patients (n=5; #13, 14, 15, 16 and 17). Non-stimulated (C) and  $\alpha$ -IgE antibody stimulated samples ( $\alpha$ -IgE) were included as controls in each patient test (left column plots). Overlapped and analysed data are displayed in Figure 6.

**Table S1. Levels of specific IgE to *D. pteronyssinus* crude extract in sera from donors.** Specific IgE (sIgE) level from allergic patients (#1-17) and non-allergic subjects (C1 and C2) was determined by ImmunoCAP-FEIA in serum samples. Single asterisk indicates sera used in *in vitro* humRBL-2H3 degranulation assays and viability assays. Black arrows indicate for *in vitro* humRBL-2H3 degranulation and viability assays. Double asterisk indicates selected patients for BAT and basophils cytotoxicity assays.
